# Supplementary material for: Few-layered ultrathin covalent organic framework membranes for gas separation: a computational study
Source: Royal Society of Chemistry journal article supplement (doi:10.1039/c5ta06707c), 2015-11-12
Supplement: c5ta06707c1.pdf [file c5ta06707c1.pdf]

## Supplementary Information

### **Few-Layered Ultrathin Covalent Organic Framework Membranes for Gas Separation: A Computational Study**

Minman Tong, Qingyuan Yang\*, Qintian Ma, Dahuan Liu and Chongli Zhong\*

*State Key Laboratory of Organic-Inorganic Composites, Beijing University of Chemical  
Technology, Beijing 100029, China*

Correspondence to: [qyyang@mail.buct.edu.cn](mailto:qyyang@mail.buct.edu.cn), [zhongcl@mail.buct.edu.cn](mailto:zhongcl@mail.buct.edu.cn).

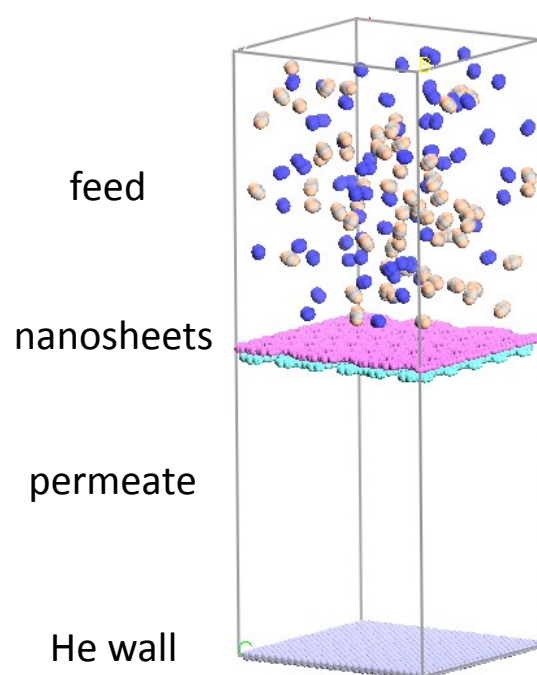

**Fig. S1** Illustration of the membrane models used in molecular dynamics simulations. (CO<sub>2</sub>:

C, silver; O, yolk yellow; N<sub>2</sub>, blue)

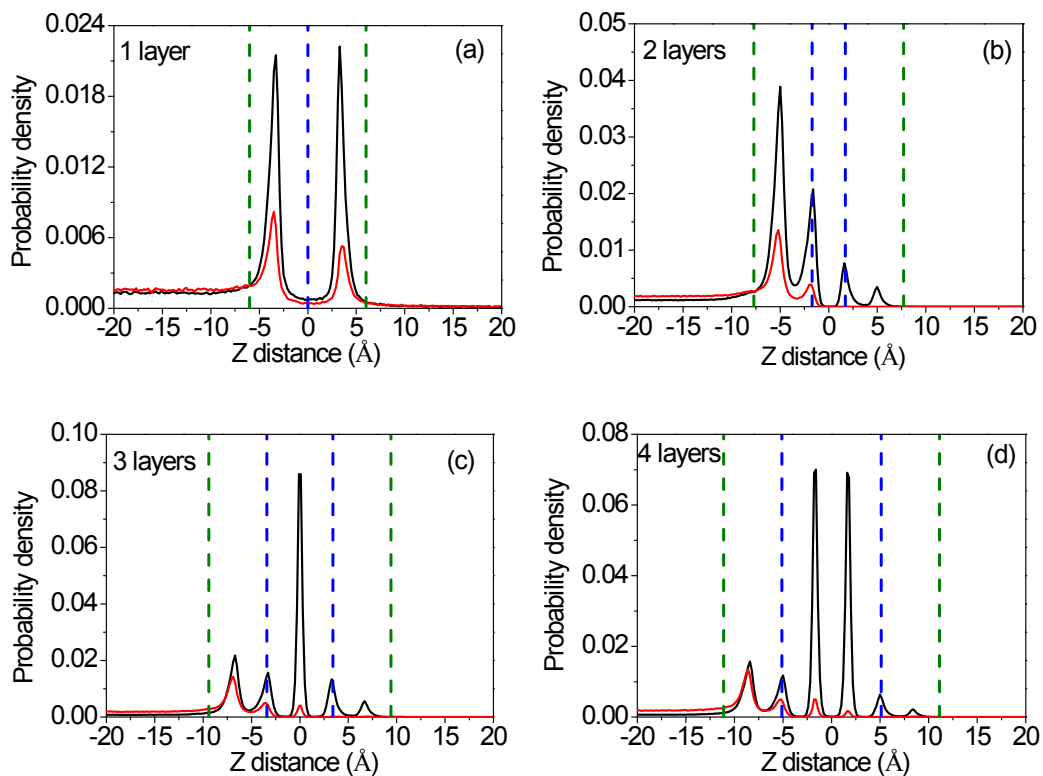

**Fig. S2** Probability density distributions of CO<sub>2</sub> and N<sub>2</sub> molecules as a function of the perpendicular distance from the membranes with different number of layers, where the origin of coordinate in each subfigure is located in the membrane center. Black and red curves are the results for CO<sub>2</sub> and N<sub>2</sub>, respectively. The region within the two blue (green) dotted lines is the membrane (adsorption-layer) zone.

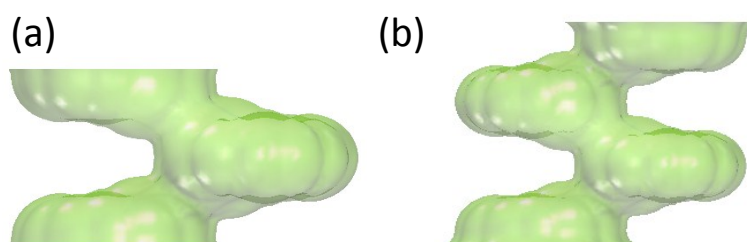

**Fig. S3** Channel structures of “periodically” designed (a) three-layered and (b) four-layered membranes

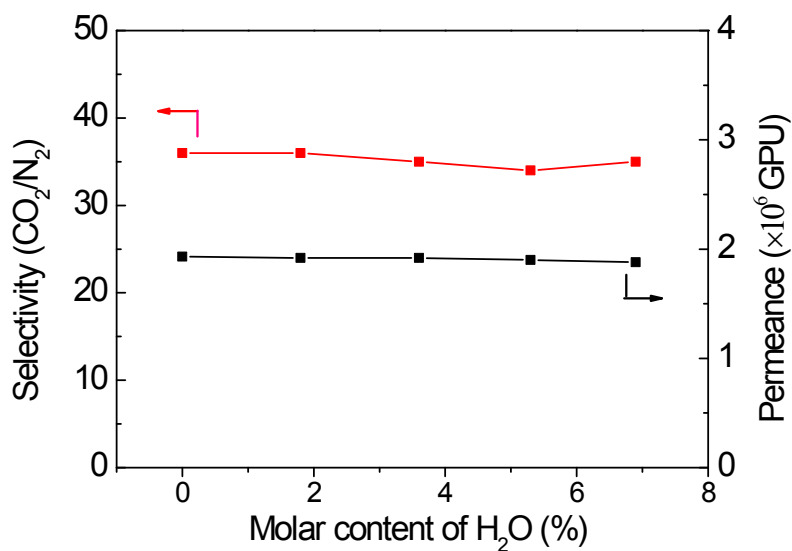

**Fig. S4** CO<sub>2</sub>/N<sub>2</sub> selectivity and the CO<sub>2</sub> permeance of the four-layered membrane of No.1, as a functional of water content in the feed CO<sub>2</sub>/N<sub>2</sub>/H<sub>2</sub>O gas mixture, CO<sub>2</sub> and N<sub>2</sub> are kept at the equimolar conditions so as to be consistent with the situation considered for the dry mixture.

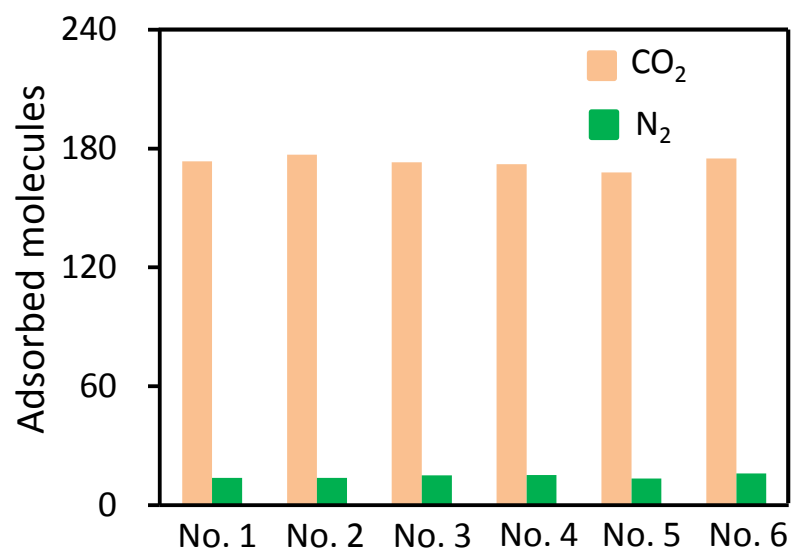

**Fig. S5** Statistically-averaged loadings of CO<sub>2</sub> and N<sub>2</sub> adsorbed in the six designed four-layered membranes.

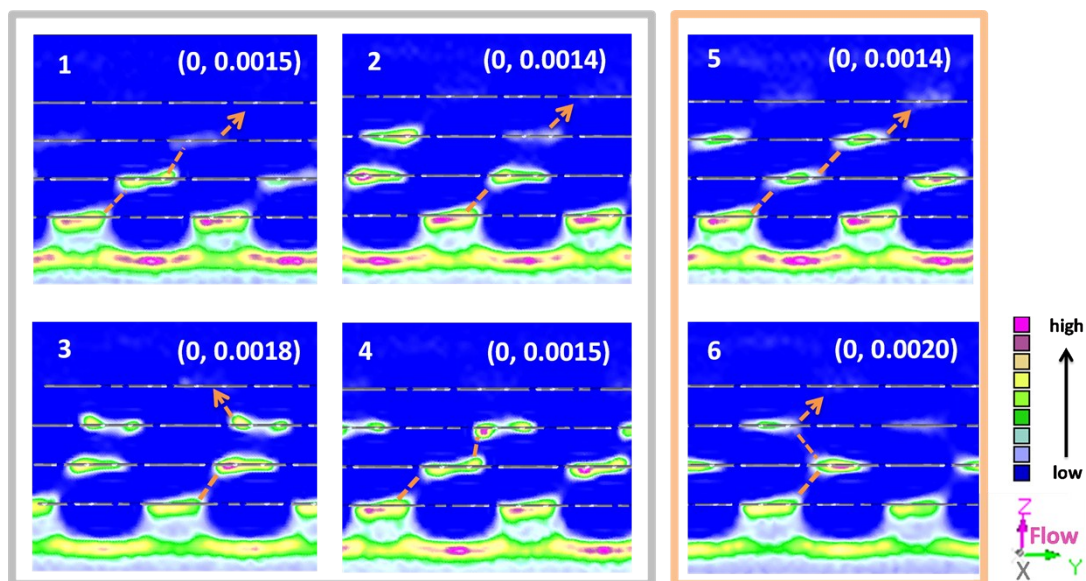

**Fig. S6** Contour plots of the COM probability distributions of  $N_2$  in the six designed membranes. One path for the No. 2 to 4 membranes is not shown because of the need to observe from the  $y$  axis. The two values in the bracket given in each subfigure represent the lowest and the highest number densities in the distributions.

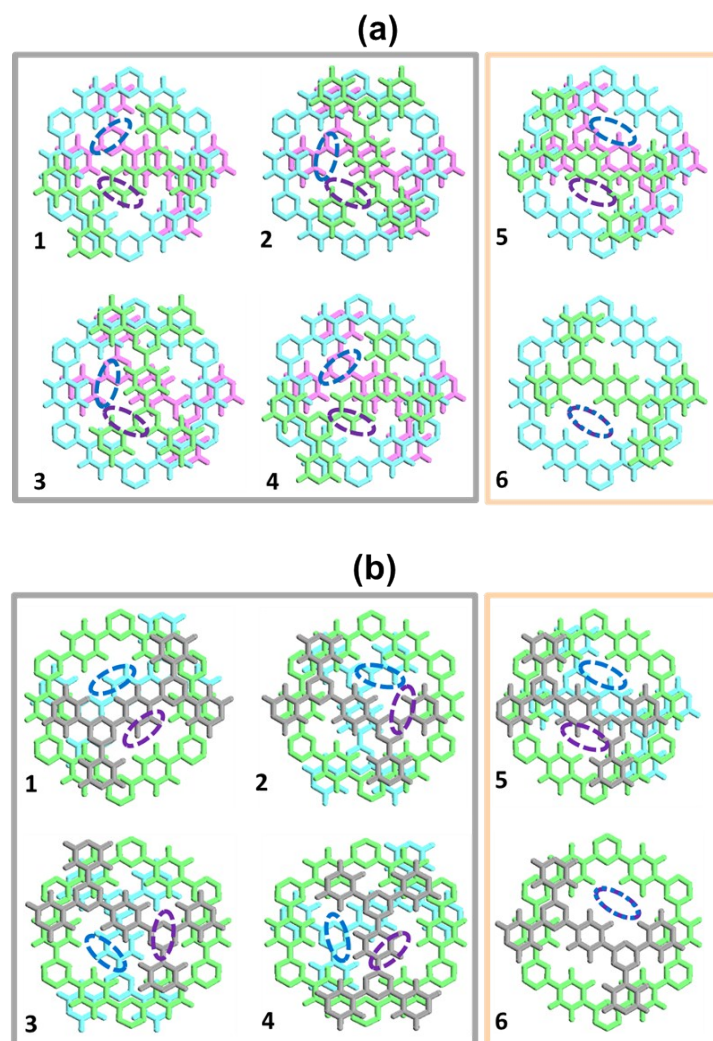

**Fig. S7** Top view of a single pore in the (a) second layer and (b) third layer of the six membranes with the up-down stacking environments by the adjacent layers. The areas enclosed by the dashed blue and purple lines are the regions located by the diffusion inlets and outlets, respectively. (First layer, pink; second layer, aquamarine; third layer, green; fourth layer, gray).
